# Supplementary material
Source: PubMed Central journal article supplement (PMC4161219)

# Supplementary figure S1.

## A

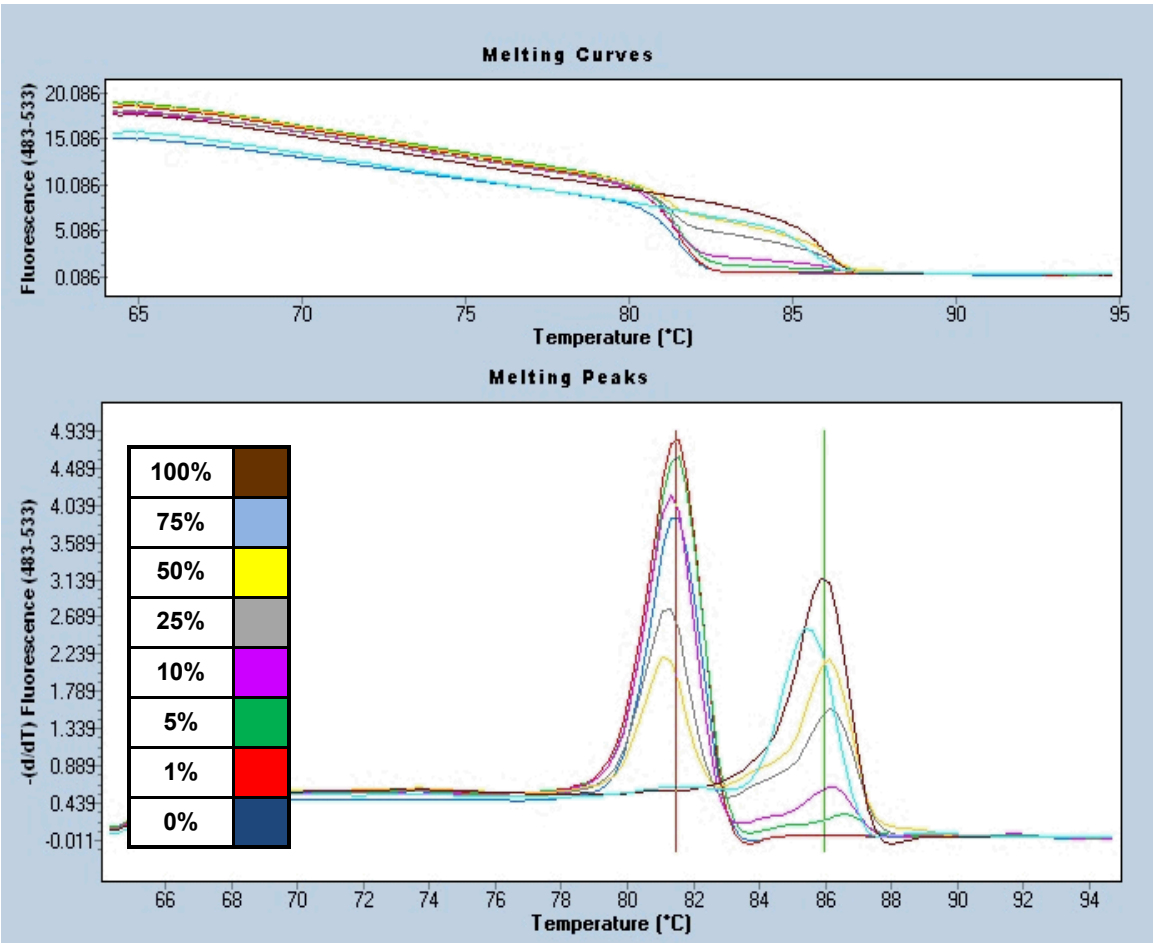

## B

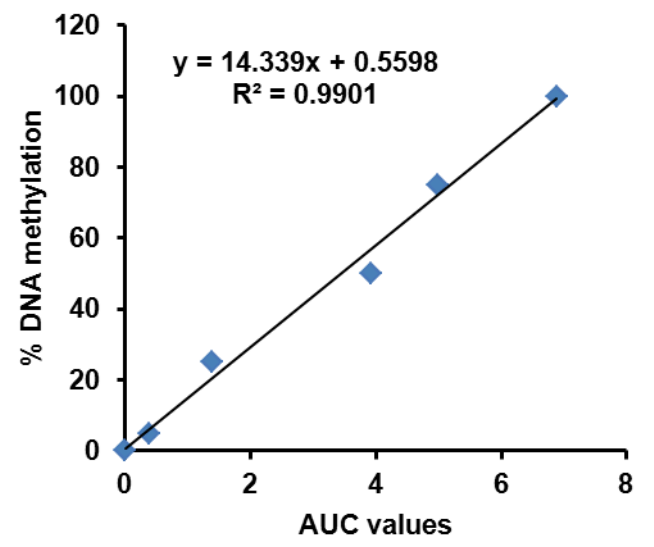

# Supplementary figure S2.

**A**

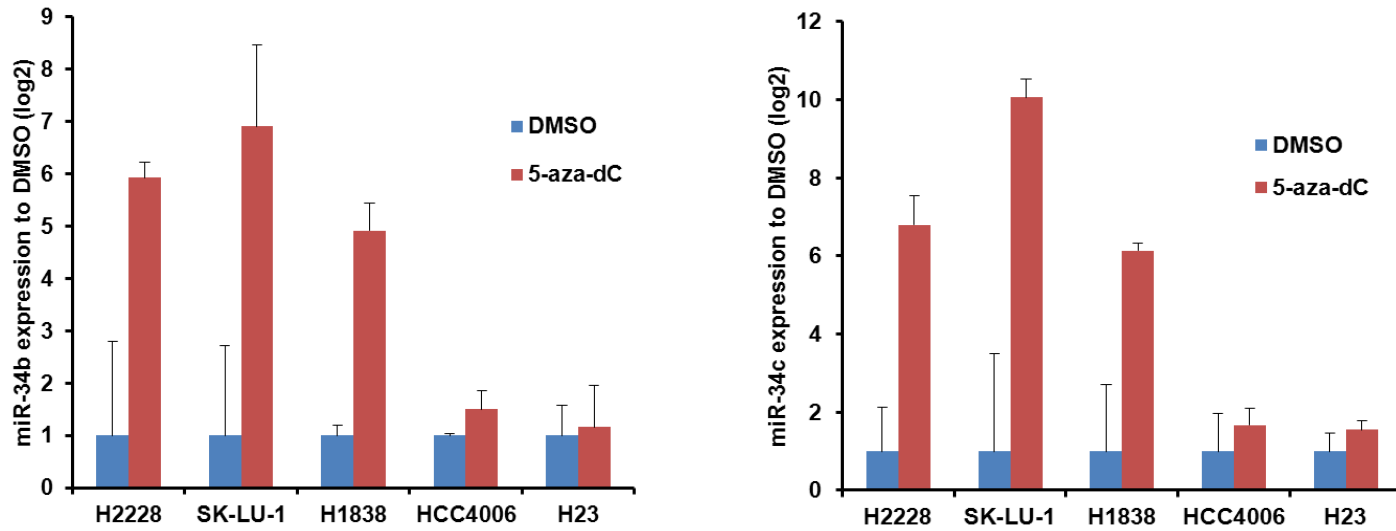

**B**

SK-LU-1 treated with DMSO

AGC G AGG GG AAT T T G AG C G G G A G G G T T T T G A G A G G A G C G G G A G G T T G C G

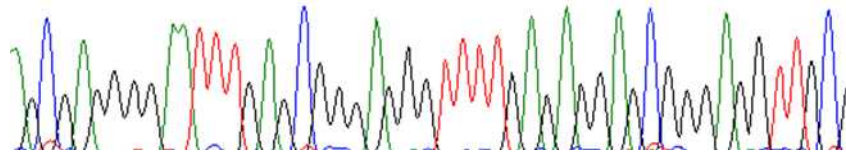

SK-LU-1 treated with 5-aza-dC

AGC G AGG GG AAT T T G AG C G G G A G G G T T T T G A G A G G A G C G G G A G G T T G C G

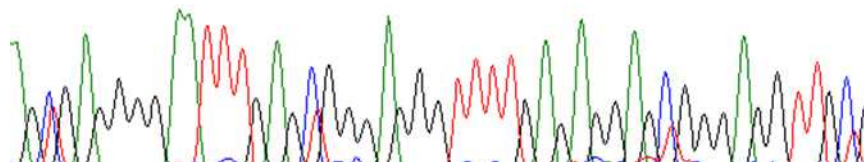

# Supplementary figure S3.

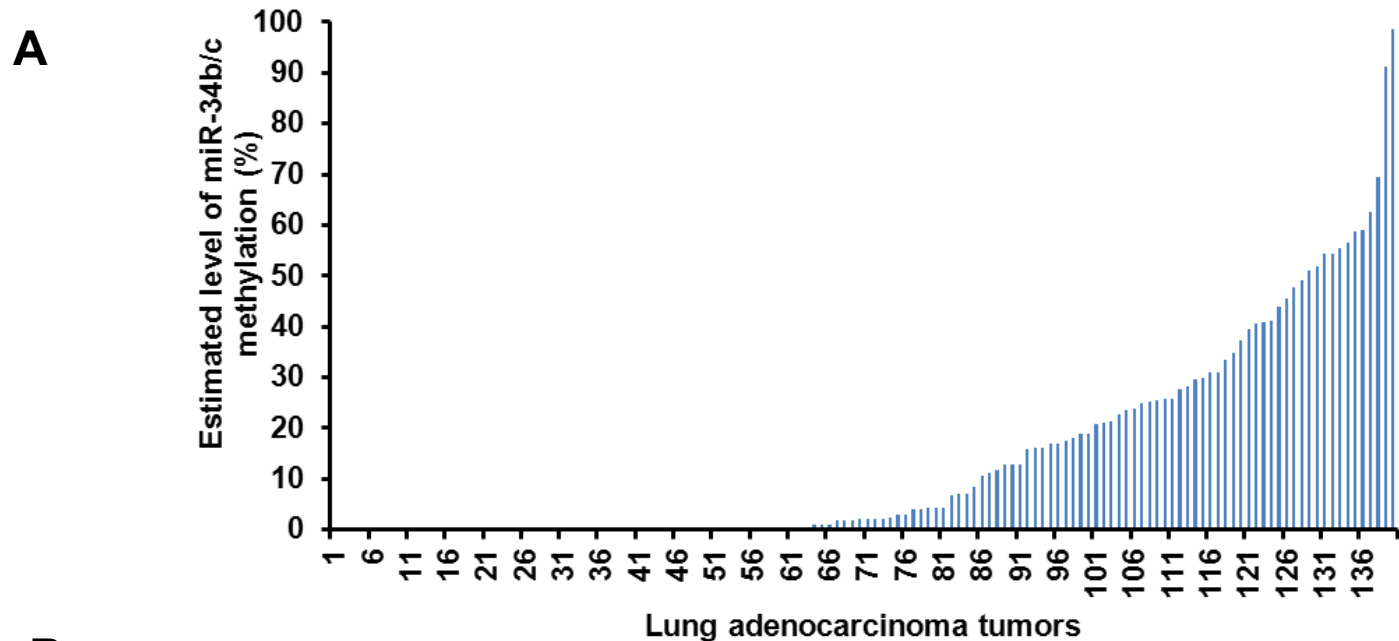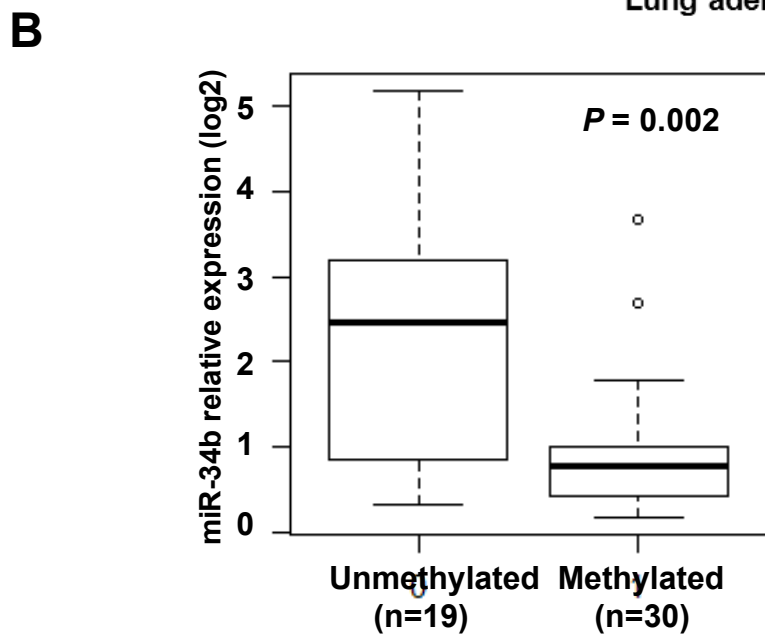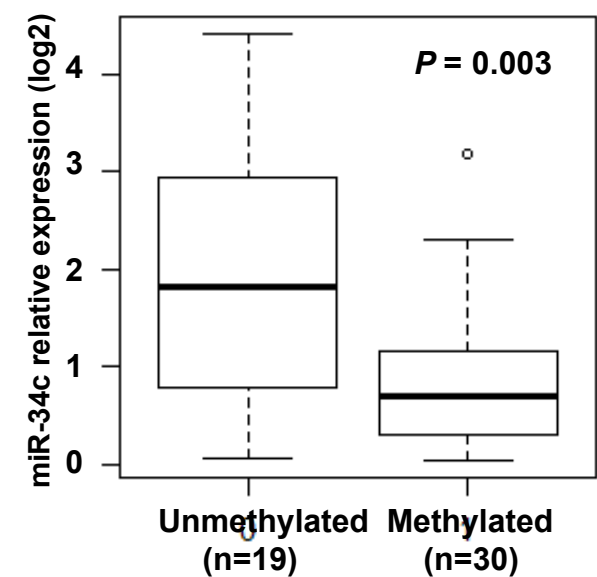

# Supplementary figure S4.

**A**

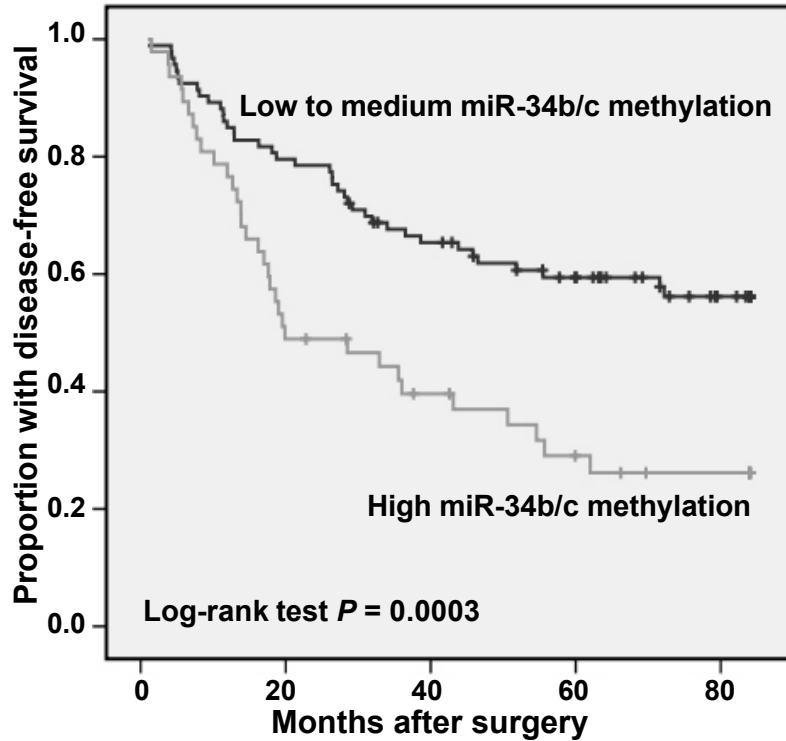

**B**

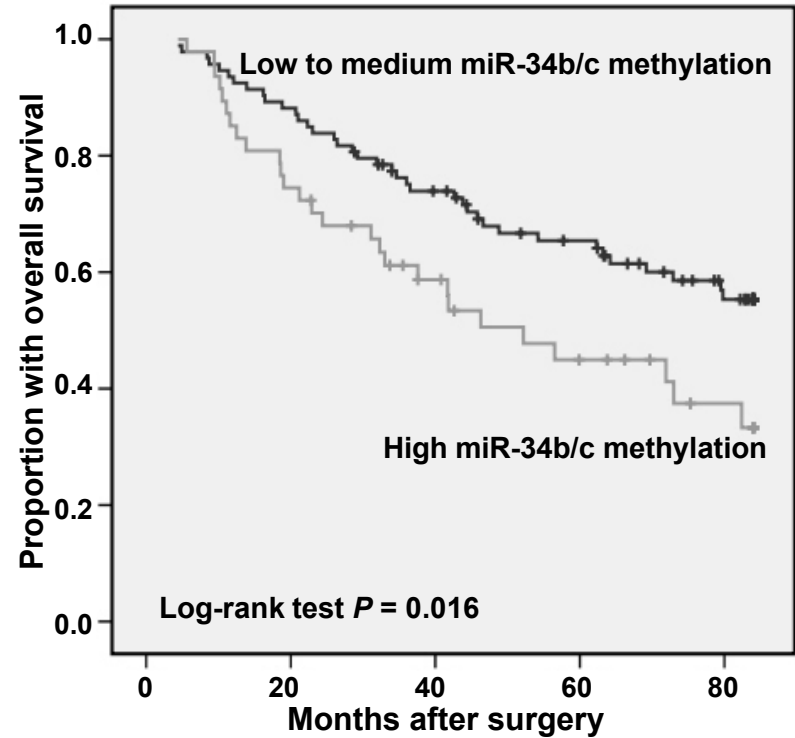

| miR-34b/c methylation | <i>n</i> | Events (%) | Median DFS (95% CI) |
|-----------------------|----------|------------|---------------------|
| Low to medium         | 93       | 39 (42%)   | Not reached         |
| High (AUC > 1.34)     | 47       | 33 (70%)   | 19.9 (1.4-38.4)     |

| miR-34b/c methylation | <i>n</i> | Events (%) | Median OS (95% CI) |
|-----------------------|----------|------------|--------------------|
| Low to medium         | 92       | 37 (40%)   | Not reached        |
| High (AUC > 1.34)     | 46       | 26 (43%)   | 15.6 (21.6-82.7)   |

# Supplementary figure S5.

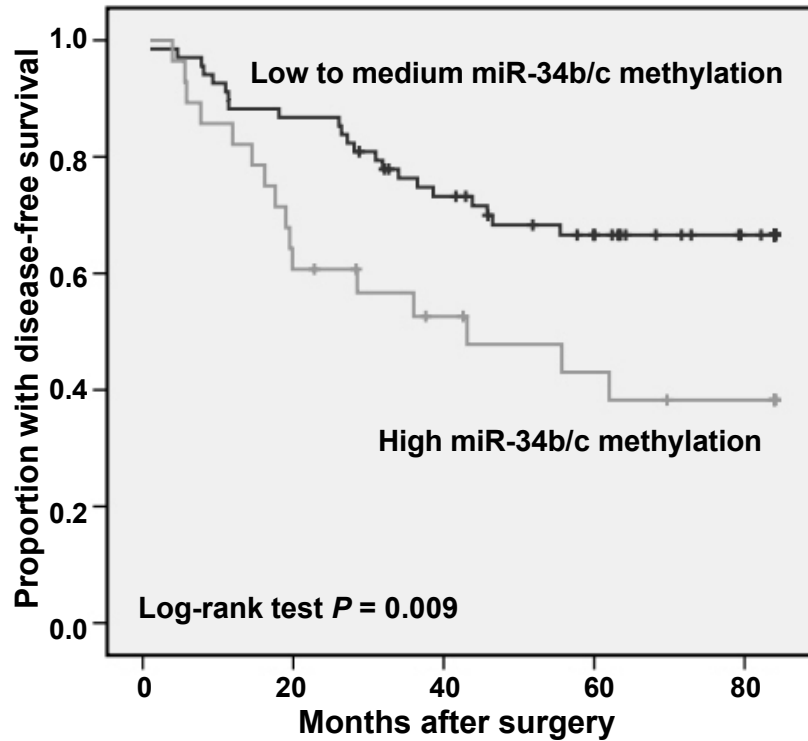

| miR-34b/c methylation | <i>n</i> | Events (%) | Median DFS (95% CI) |
|-----------------------|----------|------------|---------------------|
| Low to medium         | 68       | 22 (32%)   | Not reached         |
| High (AUC > 1.34)     | 28       | 16 (57%)   | 43.1 (4.1-85.7)     |

# Supplementary figure S6.

**A**

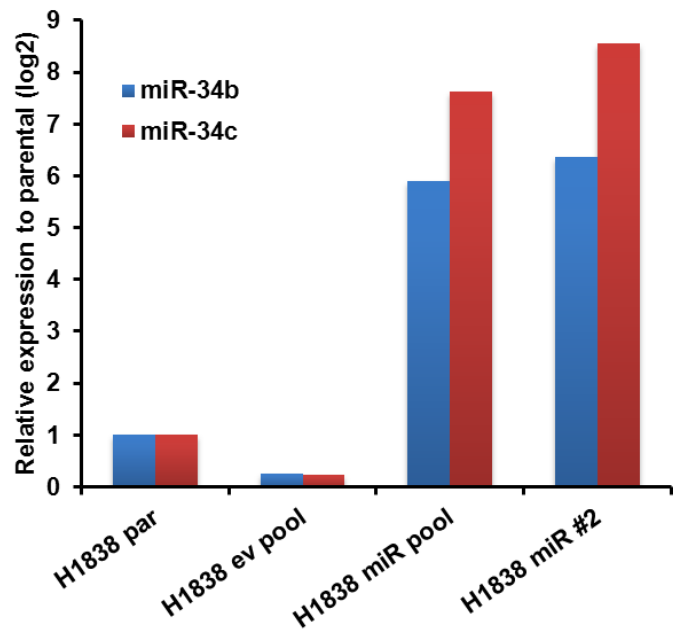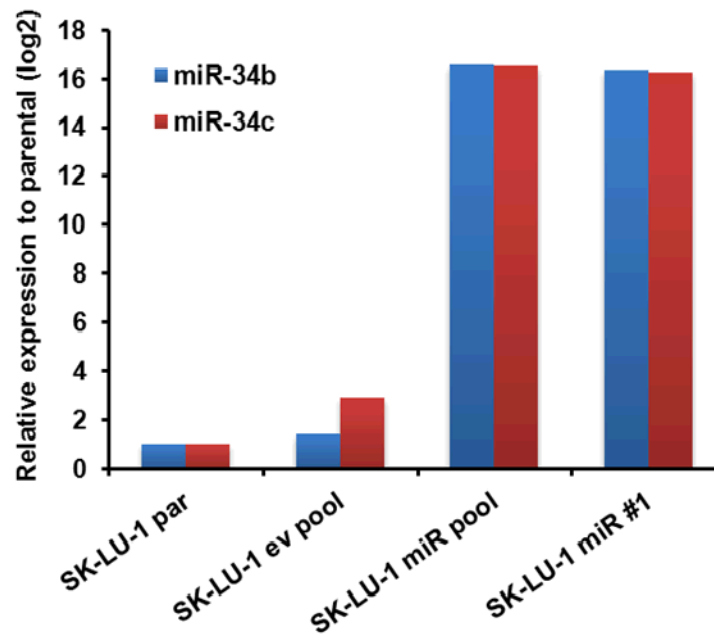

**B**

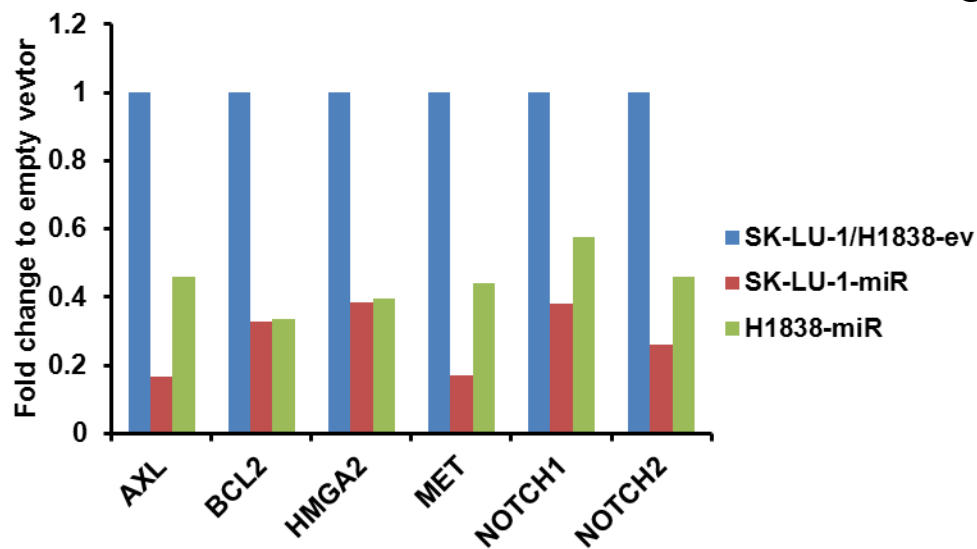

**C**

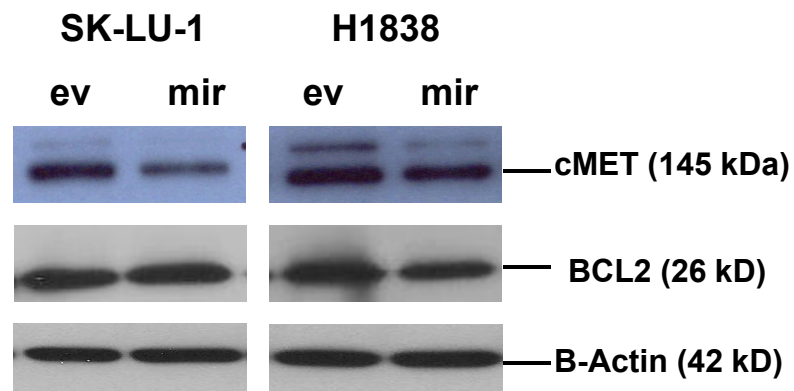

# Supplementary figure S7.

**A**

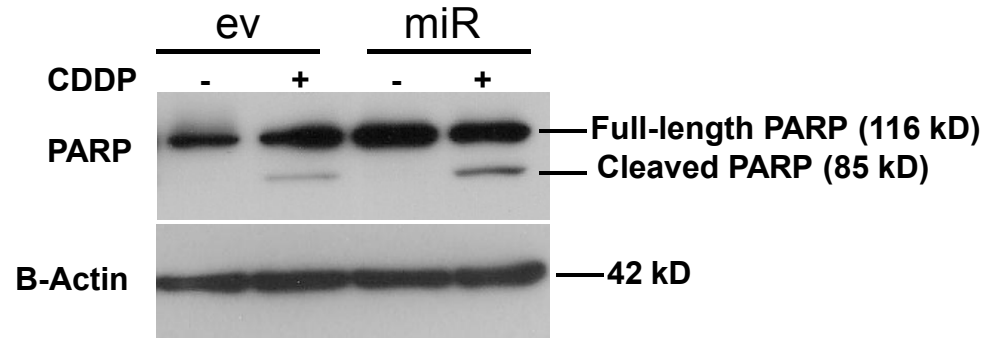

**B**

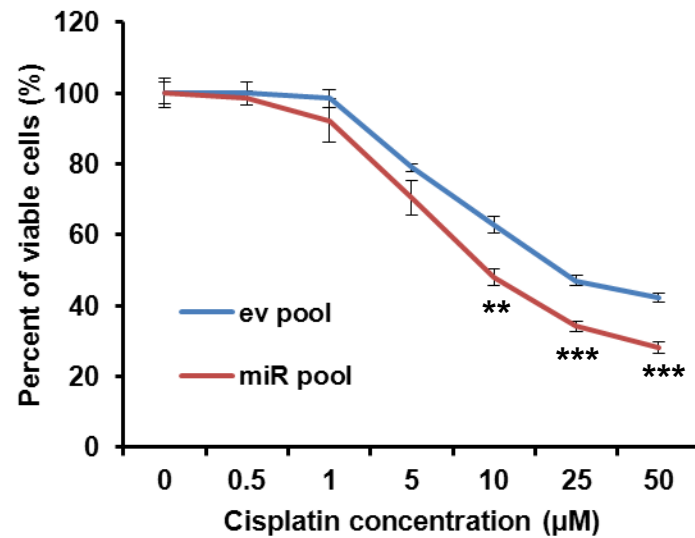

# Supplementary figure S8.

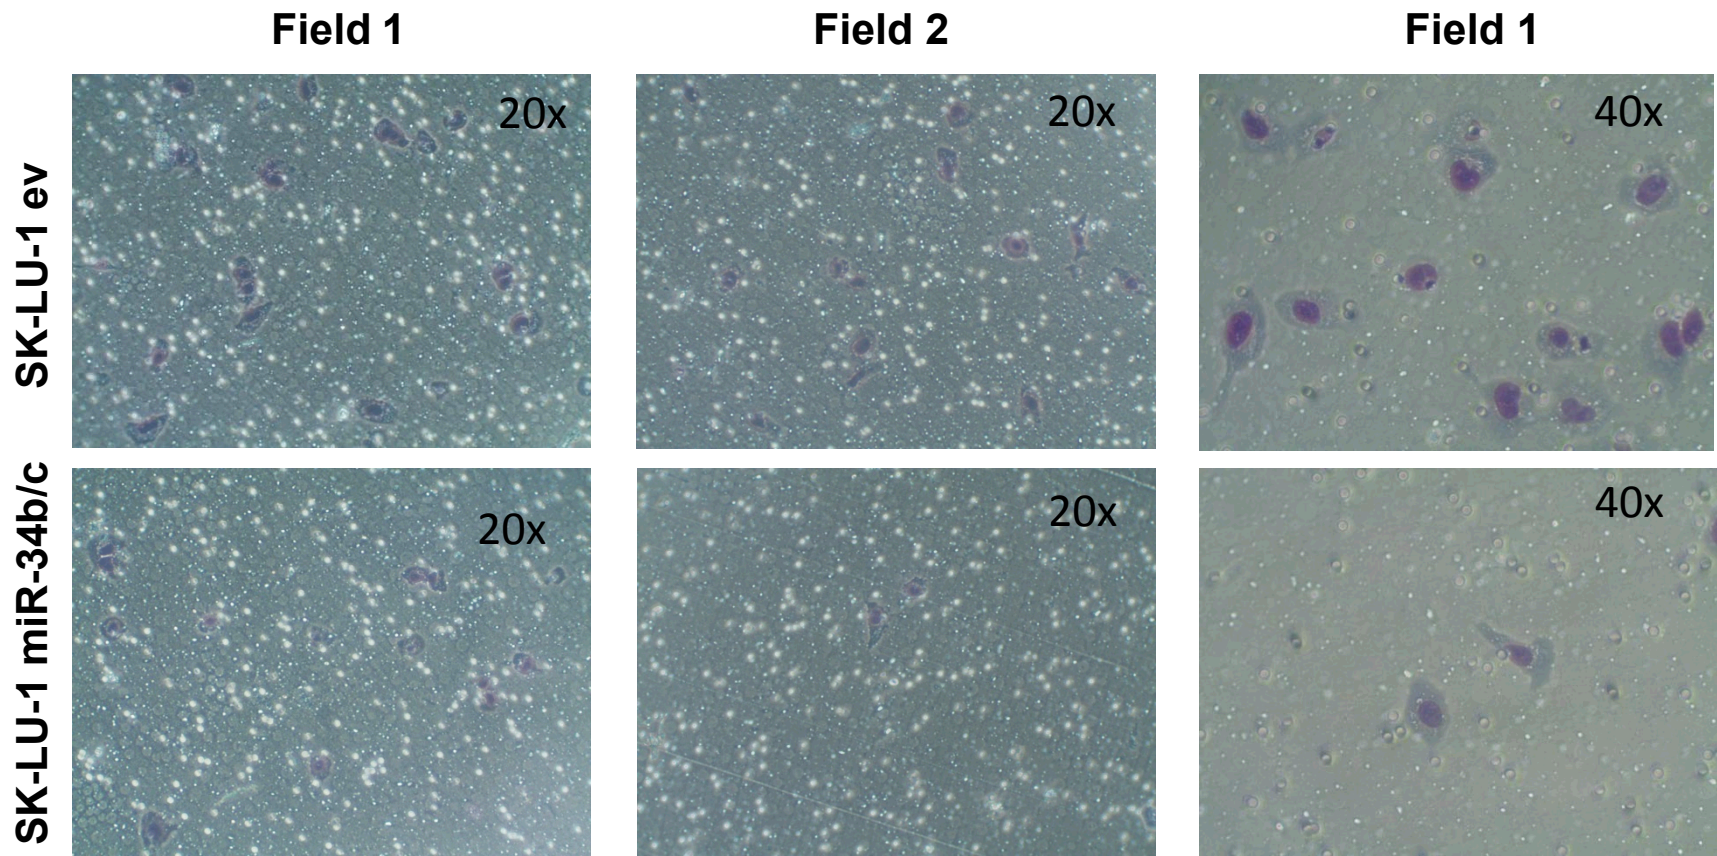

Supplement: NIHMS621522-supplement-02.pdf [file NIHMS621522-supplement-02.pdf]
